# Supplementary material
Source: bioRxiv or medRxiv preprint supplement (https://medrxiv.org/highwire/filestream/94584/field_highwire_adjunct_files/3/2020.08.24.20180653-4.pdf)
Supplement: Supplementary file [file 2020.08.24.20180653-4.pdf]

```
function [Z,h,p] = SpiegelhalterZ(y,prob,alpha)
%SpiegelhalterZ Summary of this function goes here
% This function aims to replicate
% https://github.com/easonfg/cali\_tutorial/blob/master/Spiegelhalter\_z.R
% from R into MATLAB. Originally done for QE2 extended LOS study, however
% can be used for anything in future.
% according to https://cran.r-project.org/doc/contrib/Hiebeler-matlabR.pdf
% and http://seankross.com/notes/dpqr/ and MATLAB documentation, here are
% the equivalent MATLAB functions that R has in-built.
% R function          MATLAB Equivalent          default additional arg
% pnorm               normcdf                same. mu = 0, sigma = 1
% qnorm               norminv                same. mu = 0, sigma = 1

%The R code:
% Spiegelhalter_z = function(y, prob){
%   alpha = 0.05
%   z_score = sum((y-prob)*(1-2*prob))/sqrt(sum(((1-2*prob)^2)*prob*(1-prob)))
%   print(z_score)
%   if (abs(z_score) > qnorm(1-alpha/2)){
%     print('reject null. NOT calibrated')
%   } else{
%     print('fail to reject. calibrated')
%   }
%   cat('z score: ', z_score, '\n')
%   cat('p value: ', 1-pnorm(abs(z_score)), '\n')
%   return(z_score)
% }

%MATLAB version:
%set Alpha to 0.05 if not provided.
if ~exist('alpha','var')
    alpha = 0.05;
end
%y = outcome. actual.
%prob = probability calculated by model.
%calculate z-score
Z = sum((y-prob).*(1-2*prob))/sqrt(sum(((1-2*prob).^2).*prob.*(1-prob)));
qnorm = norminv(1-alpha/2);
if abs(Z) > qnorm
    fprintf('reject null. NOT calibrated')
    h = 0;
else
    fprintf('fail to reject. calibrated')
    h = 1;
end
p = 1-normcdf(abs(Z));
end
```
